# Supplementary material for: Automatic reconstruction of the delivered dose of the day using MR-linac treatment log files and online MR imaging
Source: PubMed Central journal article supplement (PMC7191265; doi:10.1016/j.radonc.2019.12.010), 2020-04
Supplement: mmc1.pdf [file mmc1.pdf]

## Supplementary material

Table 1: Mandatory treatment planning constraints used in the PRISM protocol.

| Structure                 | Dose constraint                           |
|---------------------------|-------------------------------------------|
| Primary PTV               | $D_{98\%} > 57.0 \text{ Gy}$              |
|                           | $D_{50\%} > 59.4 \text{ Gy}$              |
|                           | $D_{50\%} < 60.6 \text{ Gy}$              |
| Secondary PTV             | $D_{98\%} > 46.17 \text{ Gy}$             |
|                           | $D_{50\%} > 48.6 \text{ Gy}$              |
| Bladder                   | $V_{52.7 \text{ Gy}} < 50\%$              |
|                           | $V_{56.7 \text{ Gy}} < 35\%$              |
|                           | $V_{60.8 \text{ Gy}} < 25\%$              |
| Rectum                    | $V_{40.5 \text{ Gy}} < 60\%$              |
|                           | $V_{48.6 \text{ Gy}} < 50\%$              |
|                           | $V_{52.7 \text{ Gy}} < 30\%$              |
|                           | $V_{56.8 \text{ Gy}} < 15\%$              |
|                           | $V_{60.8 \text{ Gy}} < 5\%$               |
| Bowel                     | $V_{36.5 \text{ Gy}} < 158 \text{ cm}^3$  |
|                           | $V_{40.5 \text{ Gy}} < 110 \text{ cm}^3$  |
|                           | $V_{44.6 \text{ Gy}} < 28 \text{ cm}^3$   |
|                           | $V_{48.7 \text{ Gy}} < 6 \text{ cm}^3$    |
|                           | $V_{52.7 \text{ Gy}} < 0.01 \text{ cm}^3$ |
| Individual femoral joints | $V_{40.5 \text{ Gy}} < 50\%$              |
| Penile bulb               | $V_{40.5 \text{ Gy}} < 50\%$              |

Table 2: Sequence parameters of the balanced steady-state free precession sequence used to acquired 2D cine MR images on the 1.5 T Unity MR-linac.

| Sequence parameter         | Value                              |
|----------------------------|------------------------------------|
| Repetition time            | 3.64 ms                            |
| Echo time                  | 1.82 ms                            |
| Flip angle                 | 40°                                |
| Pixel bandwidth            | 1076 Hz                            |
| Field of view              | 400 × 400 mm <sup>2</sup>          |
| Acquisition matrix size    | 132 × 132                          |
| Acquired voxel size        | 3.0 × 3.0 × 5.0 mm <sup>3</sup>    |
| Reconstruction matrix size | 336 × 336                          |
| SENSE factor               | 3.0 (RL)                           |
| Reconstructed voxel size   | 1.19 × 1.19 × 5.00 mm <sup>3</sup> |

Table 3: Sequence parameters of the sequence used to acquire T2-weighted 3D verification images on the 1.5 T Unity MR-linac.

| Sequence parameter           | Value                              |
|------------------------------|------------------------------------|
| Repetition time              | 1535 ms                            |
| Echo time                    | 278 ms                             |
| Flip angle                   | 90°                                |
| Pixel bandwidth              | 740 Hz                             |
| Field of view                | 400 × 400 × 300 mm <sup>3</sup>    |
| Acquisition matrix size      | 268 × 268 × 300                    |
| Acquired voxel size          | 1.5 × 1.5 × 2.0 mm <sup>3</sup>    |
| Reconstruction matrix size   | 480 × 480 × 300                    |
| Reconstructed voxel size     | 0.83 × 0.83 × 2.00 mm <sup>3</sup> |
| Slice spacing                | 1 mm                               |
| SENSE factor                 | 3.6 (RL)                           |
| Partial Fourier (Halfscan Y) | 0.62                               |
